# Supplementary material for: New Classes of Mind Bomb-Interacting Proteins Identified from Yeast Two-Hybrid Screens
Source: PubMed Central journal article supplement (PMC3979679; doi:10.1371/journal.pone.0093394), 2014-04-08
Supplement: pone.0093394.s001.pdf [file pone.0093394.s001.pdf]

Figure S1. Alignment of Usp1 amino acid sequences

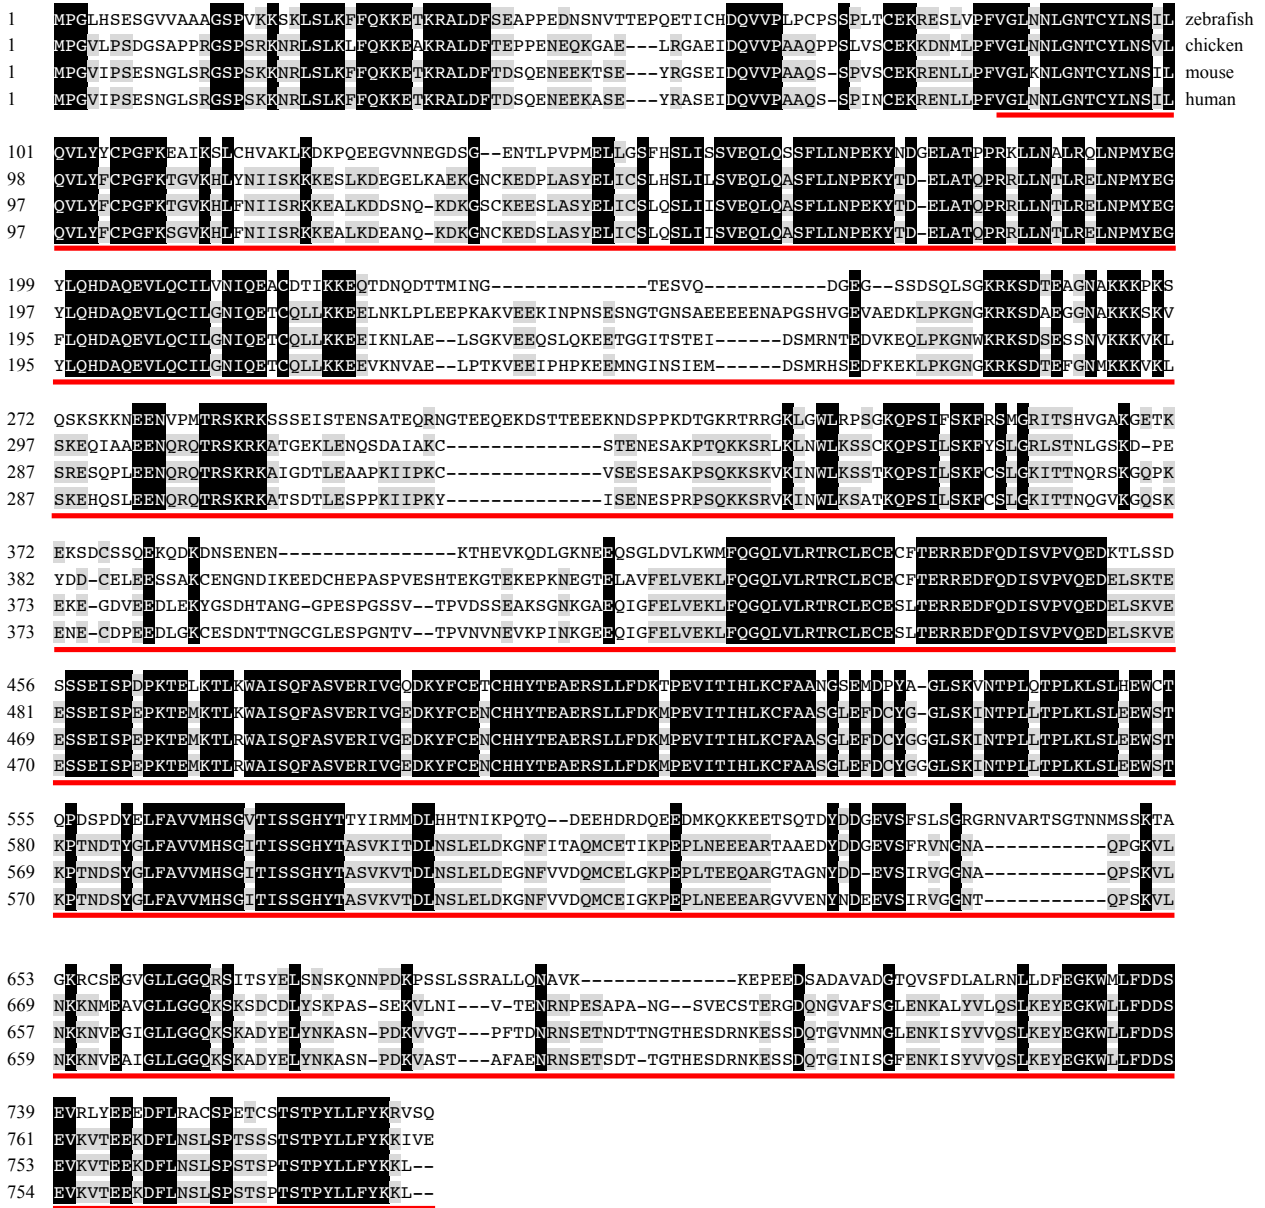

**Figure S1.** Alignment of Usp1 amino acid sequences. Alignment of zebrafish Usp1 (*Danio rerio*, NP\_955873.1), chicken Usp1 (*Gallus gallus*, NP\_001026461.1), mouse Usp1 (*Mus musculus*, AAH20007.1) and human Usp1 (*Homo sapiens*, NP\_001017416.1). Zebrafish Usp1 bears 51.49%, 52.39% and 53.14% amino acids identity to its counterparts of chicken, mouse and human, respectively. Red line indicates the region of ubiquitin-specific protease (USP) domain.
