# Supplementary material for: New Classes of Mind Bomb-Interacting Proteins Identified from Yeast Two-Hybrid Screens
Source: PubMed Central journal article supplement (PMC3979679; doi:10.1371/journal.pone.0093394), 2014-04-08
Supplement: pone.0093394.s002.pdf [file pone.0093394.s002.pdf]

Figure S2. Alignment of Usp9 amino acid sequences

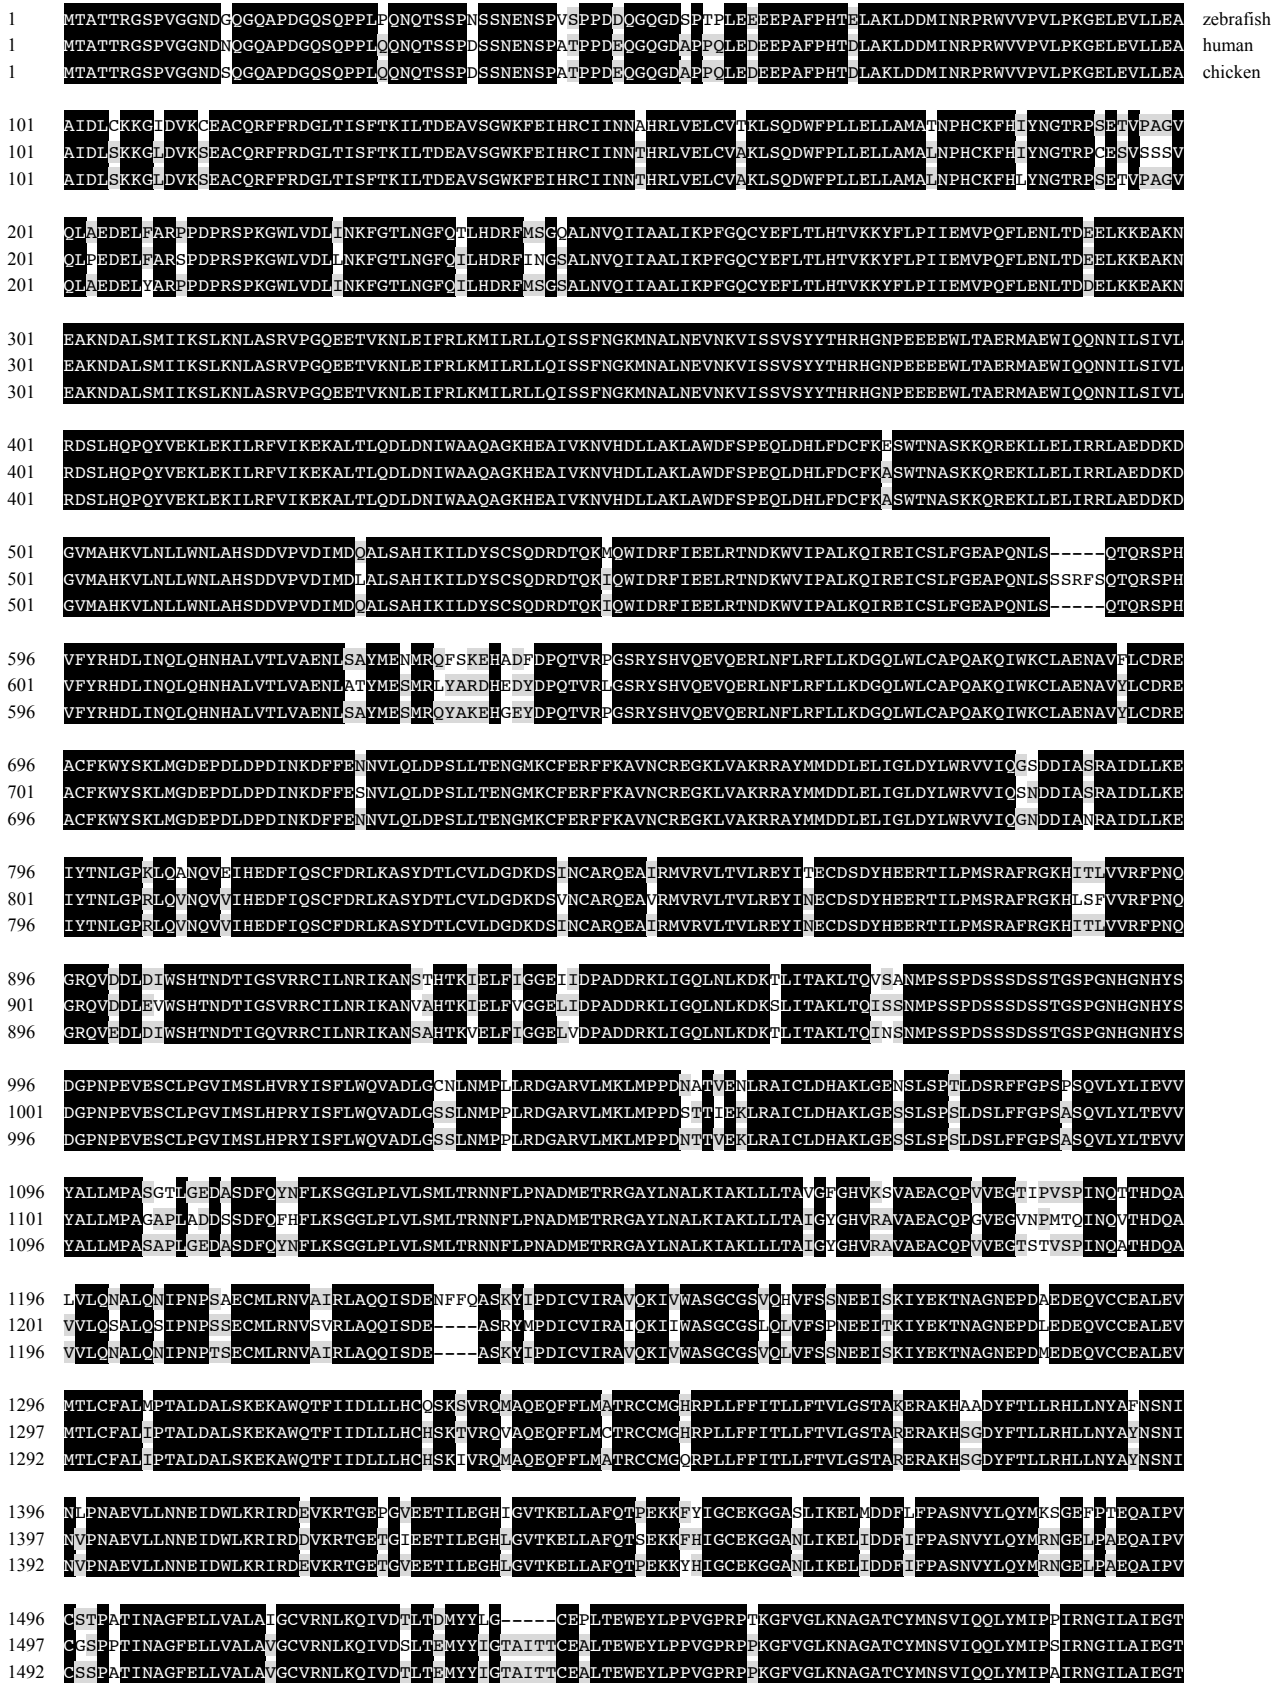

```

1591 GSDVDDMSGDEKQDNESNVDPRDVFVGYQHDFDDKPSLSKSEDRKEYNIGVLRHLQVIFGHLAASRLQYVPRGFWKQFRLWGEPVNLREQHDALFEFFN
1597 GSDVDDMSGDEKQDNESNVDPRDVFVGYPODFEDKPALSKEEDRKEYNIGVLRHLQVIFGHLAASRLQYVPRGFWKQFRLWGEPVNLREQHDALFEFFN
1592 GSDVDDMSGDEKQDNESNVDPRDVFVGYPHQYEDKPALSKEEDRKEYNIGVLRHLQVIFGHLAASRLQYVPRGFWKQFRLWGEPVNLREQHDALFEFFN

1691 SLVDSLDEALKALGHPAMLSKVLGGSFADQKICQGCPhRYECEESFTTLNVDIRNHONLLDSLEQYVKGDLLEGANAYHCEKCNKKVDTVKRLLIKLLPP
1697 SLVDSLDEALKALGHPAMLSKVLGGSFADQKICQGCPhRYECEESFTTLNVDIRNHONLLDSLEQYVKGDLLEGANAYHCEKCNKKVDTVKRLLIKLLPP
1692 SLVDSLDEALKALGHPAMLSKVLGGSFADQKICQGCPhRYECEESFTTLNVDIRNHONLLDSLEQYVKGDLLEGANAYHCEKCNKKVDTVKRLLIKLLPP

1791 VLAIQLKRFDYDWERECAIKFNDFEFPRELDMPEYTVAGVAKLEGSDVHPENQQOVIQONEPSEPEPPGSSRYRLVGVLVHSGQASGGHYYSYIIQRNG
1797 VLAIQLKRFDYDWERECAIKFNDFEFPRELDMPEYTVAGVAKLEGSDVHPENQQOVIQONEPSEPEPPGSSRYRLVGVLVHSGQASGGHYYSYIIQRNG
1792 VLAIQLKRFDYDWERECAIKFNDFEFPRELDMPEYTVAGVAKLEGSDVHPENQQOVIQONEPSEPEPPGSSRYRLVGVLVHSGQASGGHYYSYIIQRNG

1891 SGGEGERNRWYKFDGDDVTECKMDDDEEMKNQCFGGEYMGVEVFDHMMKMSYRRQKRWWNAYILFYERMDTIDDKDSELVRYISELAITTRPHQIIMP SAI
1895 --GDGERNRWYKFDGDDVTECKMDDDEEMKNQCFGGEYMGVEVFDHMMKMSYRRQKRWWNAYILFYERMDTIDDKDSELVRYISELAITTRPHQIIMP SAI
1889 --GDGERNRWYKFDGDDVTECKMDDDEEMKNQCFGGEYMGVEVFDHMMKMSYRRQKRWWNAYILFYERMDTIDDKDSELVRYISELAITTRPHQIIMP SAI

1991 ERSVRKQNVQFMHNRMQYSLEYFQFIRKLLTCNSVYLNPPGQDHLPEAEEMAMISIQLAARFLFTGFGHTKKIVRGPSADWDYDALCILLRHSKNVRYW
1993 ERSVRKQNVQFMHNRMQYSMEYFQFMKLLTCNGVYLNPPGQDHLPEAEEMAMISIQLAARFLFTGFGHTKKIVRGPSADWDYDALCILLRHSKNVRYW
1987 ERSVRKQNVQFMHNRMQYSLEYFQFIRKLLTCNSVYLNPPGQDHLPEAEEMAMISIQLAARFLFTGFGHTKKIVRGPSADWDYDALCILLRHSKNVRYW

2091 FAHNVLFNVSNRFSLEYLLECP SAEVRGAF AKLIVFIAHFSLQDGP CSPFASPGPSSQAYDNLSLSDHLLRAVLNLLRREVSEHGRHLQOYFNL FVMYAN
2093 FAHNVLFNVSNRFSLEYLLECP SAEVRGAF AKLIVFIAHFSLQDGP CSPFASPGPSSQAYDNLSLSDHLLRAVLNLLRREVSEHGRHLQOYFNL FVMYAN
2087 FAHNVLFNVSNRFSLEYLLECP SAEVRGAF AKLIVFIAHFSLQDGP CSPFASPGPSSQAYDNLSLSDHLLRAVLNLLRREVSEHGRHLQOYFNL FVMYAN

2191 LGVAEKTQLLKL SVPATFMLVSLDEGPGPPIKYQY AELGKLYVVSQLRCCNVSSRMQSSINGNPPLANPYGDPNLSQPIMP IQQNVADILFVRTSYVK
2193 LGVAEKTQLLKL SVPATFMLVSLDEGPGPPIKYQY AELGKLYVVSQLRCCNVSSRMQSSINGNPPLANPYGDPNLSQPIMP IQQNVADILFVRTSYVK
2187 LGVAEKTQLLKL SVPATFMLVSLDEGPGPPIKYQY AELGKLYVVSQLRCCNVSSRMQSSINGNPPLANPYGDPNLSQPIMP IQQNVADILFVRTSYVK

2291 KIIEDCSNSEDITIKLLRFCCWENPQFSSTVLSSELLWQVAYSITYELRPYLDLLQILLIEDSWQTHRIHNVLKGI PDDRGLFDTIQRSKNHYQKRAYQC
2293 KIIEDCSNSEDITIKLLRFCCWENPQFSSTVLSSELLWQVAYSITYELRPYLDLLQILLIEDSWQTHRIHNVLKGI PDDRGLFDTIQRSKNHYQKRAYQC
2287 KIIEDCSNSEDITIKLLRFCCWENPQFSSTVLSSELLWQVAYSITYELRPYLDLLQILLIEDSWQTHRIHNVLKGI PDDRGLFDTIQRSKNHYQKRAYQC

2391 IKCMVALFSNCPVAYQILOSNGDLKRKWTWAVEWLGDELERRPYTGNPQYTYNNWSPPVQSNETSNGYFLERSHSARMTLAKACELCP EEPDDEQEAALDE
2393 IKCMVALFSNCPVAYQILOSNGDLKRKWTWAVEWLGDELERRPYTGNPQYTYNNWSPPVQSNETSNGYFLERSHSARMTLAKACELCP EEPDDEQEAALDE
2387 IKCMVALFSNCPVAYQILOSNGDLKRKWTWAVEWLGDELERRPYTGNPQYTYNNWSPPVQSNETSNGYFLERSHSARMTLAKACELCP EEPDDEQEAALDE

2491 QDPSPPEDATLYPHSPGSKFOQONNLPHTOPYTGPAAHMNNPQRTGQRAQENYEGSEEVSPQTKDQ
2493 HESPPEDAPLYPHSPGSKFOQONNLPHTOPYTGPAAHMNNPQRTGQRAQENYEGSEEVSPQTKDQ
2487 HESPPEDAPLYPHSPGSKFOQONNLPHTOPYTGPAAHMNNPQRTGQRAQENYEGSEEVSPQTKDQ

```

**Figure S2.** Alignment of Usp9 amino acid sequences. Alignment of zebrafish Usp9 (*Danio rerio*, our sequence), human Usp9 (*Homo sapiens*, XP\_005272733.1) and chicken Usp9 (*Gallus gallus*, XP\_416773.2). Zebrafish Usp9 bears 90.04% and 92.58% amino acids identity to its counterparts of human and chicken, respectively. Red line indicates the region of ubiquitin-specific protease (USP) domain.
