# Supplementary material for: New Classes of Mind Bomb-Interacting Proteins Identified from Yeast Two-Hybrid Screens
Source: PubMed Central journal article supplement (PMC3979679; doi:10.1371/journal.pone.0093394), 2014-04-08
Supplement: pone.0093394.s003.pdf [file pone.0093394.s003.pdf]

Figure S3. Alignment of Travid amino acid sequences

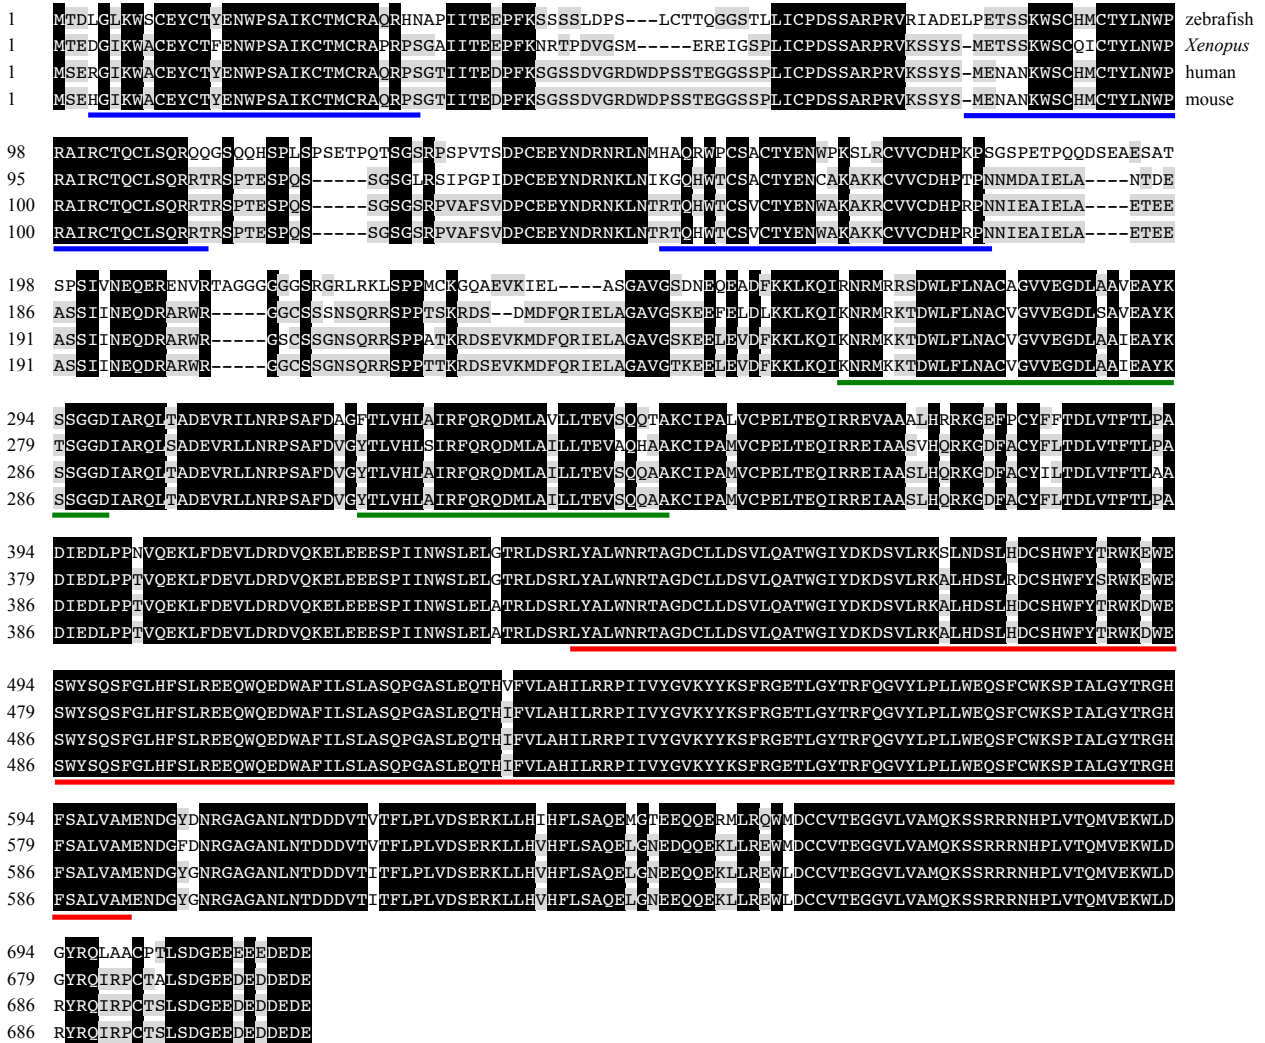

**Figure S3.** Alignment of Travid amino acid sequences. Alignment of zebrafish Travid (*Danio rerio*, our sequence), African clawed frog Travid (*Xenopus laevis*, NP\_001084698), human Travid (*Homo sapiens*, CAB64449) and mouse Travid (*Mus musculus*, NP\_997185). Zebrafish Travid bears 78.88%, 80.17% and 80.31% amino acids identity to its counterparts of *Xenopus*, human and mouse, respectively. Blue line indicates the region of Npl4 zinc finger domain (NZF). Green line indicates the region of ankyrin repeat. Red line indicates the region of ovarian tumor protease (OTU) domain.
