# Supplementary material for: New Classes of Mind Bomb-Interacting Proteins Identified from Yeast Two-Hybrid Screens
Source: PubMed Central journal article supplement (PMC3979679; doi:10.1371/journal.pone.0093394), 2014-04-08
Supplement: pone.0093394.s004.pdf [file pone.0093394.s004.pdf]

Figure S4. Alignment of Fih-1 amino acid sequences

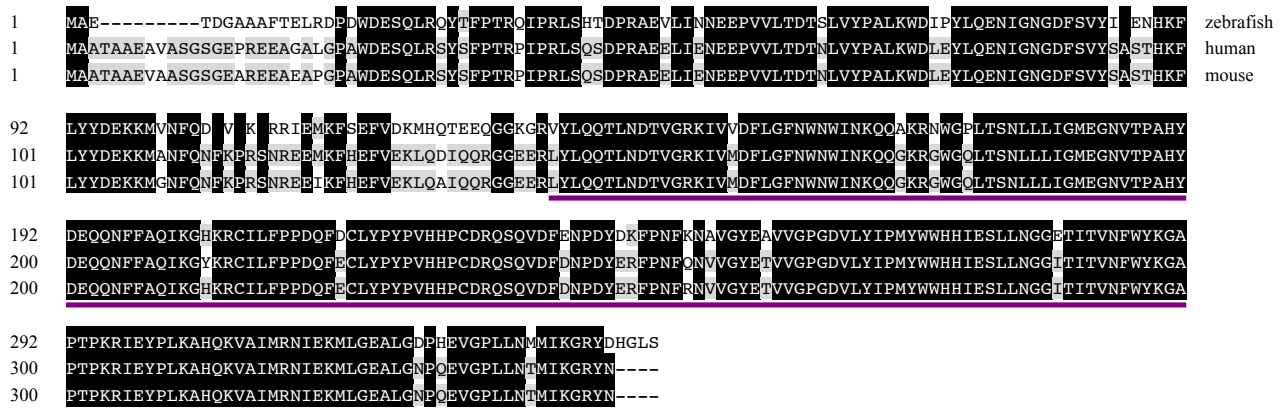

**Figure S4.** Alignment of Fih-1 amino acid sequences. Alignment of zebrafish Fih-1 (*Danio rerio*, our sequence), human Fih-1 (*Homo sapiens*, NP\_060372.2) and mouse Fih-1 (*Mus musculus*, NP\_795932.2). Zebrafish Fih-1 bears 81.76% and 82.35% amino acids identity to its counterparts of human and mouse, respectively. Purple line indicates the region of JmjC domain.
